# Supplementary material for: Childhood and Adolescent Central Nervous System Tumours in Spain: Incidence and Survival over 20 Years: A Historical Baseline for Current Assessment
Source: MDPI journal article supplement (doi:10.3390/cancers15245889), 2023-12-18
Supplement: s1 [file Supplementary Material.pdf › Supplementary Material.pdf]

## Supplementary material

# INCIDENCE

**Table S1.** Number of cases of CNS tumours in children and adolescents, according to the International Classification of Childhood Cancer, 3rd Edition (ICCC-3), in Spain, 1983-2007, by incidence and survival period, and their respective percentages. All percentages are with respect to total tumours in III. Central Nervous System.

| Morphology ICD-O-3                                              | Incidence period (1983-2007) |              |             |              | Survival period (1991-2005) |              |             |              |
|-----------------------------------------------------------------|------------------------------|--------------|-------------|--------------|-----------------------------|--------------|-------------|--------------|
|                                                                 | 0-14 years                   |              | 15-19 years |              | 0-14 years                  |              | 15-19 years |              |
|                                                                 | N                            | %            | N           | %            | N                           | %            | N           | %            |
| <b>III CENTRAL NERVOUS SYSTEM</b>                               | <b>1,635</b>                 | <b>100.0</b> | <b>328</b>  | <b>100.0</b> | <b>972</b>                  | <b>100.0</b> | <b>199</b>  | <b>100.0</b> |
| <b>IIIa. EPENDYMOMAS AND CHOROID PLEXUS TUMOURS</b>             | <b>163</b>                   | <b>10.0</b>  | <b>20</b>   | <b>6.1</b>   | <b>84</b>                   | <b>8.6</b>   | <b>16</b>   | <b>8.0</b>   |
| <b>IIIa1. Ependymomas</b>                                       | <b>137</b>                   | <b>8.4</b>   | <b>20</b>   | <b>6.1</b>   | <b>75</b>                   | <b>7.7</b>   | <b>16</b>   | <b>8.0</b>   |
| 93831 Subependymoma                                             | 1                            | 0.1          | 2           | 0.6          | 0                           | 0.0          | 2           | 1.0          |
| 93913 Ependymoma, NOS                                           | 91                           | 5.6          | 13          | 4.0          | 48                          | 4.9          | 10          | 5.0          |
| 93923 Ependymoma, anaplastic                                    | 32                           | 2.0          | 2           | 0.6          | 19                          | 2.0          | 2           | 1.0          |
| 93933 Papillary ependymoma                                      | 1                            | 0.1          | 1           | 0.3          | 1                           | 0.1          | 0           | 0.0          |
| 93941 Myxopapillary ependymoma                                  | 12                           | 0.7          | 2           | 0.6          | 7                           | 0.7          | 2           | 1.0          |
| <b>IIIa2. Choroid plexus tumour</b>                             | <b>26</b>                    | <b>1.6</b>   | <b>0</b>    | <b>0.0</b>   | <b>9</b>                    | <b>0.9</b>   | <b>0</b>    | <b>0.0</b>   |
| 93900 Choroid plexus papilloma, NOS                             | 11                           | 0.7          | 0           | 0.0          | 4                           | 0.4          | 0           | 0.0          |
| 93901 Atypical choroid plexus papilloma                         | 1                            | 0.1          | 0           | 0.0          | 0                           | 0.0          | 0           | 0.0          |
| 93903 Choroid plexus carcinoma                                  | 14                           | 0.9          | 0           | 0.0          | 5                           | 0.5          | 0           | 0.0          |
| <b>IIIb. ASTROCYTOMAS</b>                                       | <b>682</b>                   | <b>41.7</b>  | <b>145</b>  | <b>44.2</b>  | <b>416</b>                  | <b>42.8</b>  | <b>98</b>   | <b>49.2</b>  |
| 93803 Glioma, malignant (topo 72.3)                             | 39                           | 2.4          | 1           | 0.3          | 22                          | 2.3          | 1           | 0.5          |
| 93841 Subependymal giant cell astrocytoma                       | 7                            | 0.4          | 4           | 1.2          | 6                           | 0.6          | 3           | 1.5          |
| 94003 Astrocytoma, NOS                                          | 371                          | 22.7         | 74          | 22.6         | 212                         | 21.8         | 45          | 22.6         |
| 94013 Astrocytoma, anaplastic                                   | 21                           | 1.3          | 5           | 1.5          | 14                          | 1.4          | 3           | 1.5          |
| 94103 Protoplasmic astrocytoma                                  | 13                           | 0.8          | 4           | 1.2          | 10                          | 1.0          | 1           | 0.5          |
| 94113 Gemistocytic astrocytoma                                  | 0                            | 0.0          | 1           | 0.3          | 0                           | 0.0          | 1           | 0.5          |
| 94203 Fibrillary astrocytoma                                    | 21                           | 1.3          | 4           | 1.2          | 16                          | 1.6          | 3           | 1.5          |
| 94211 Pilocytic astrocytoma                                     | 169                          | 10.3         | 30          | 9.1          | 113                         | 11.6         | 25          | 12.6         |
| 94233 Polar spongioblastoma                                     | 2                            | 0.1          | 0           | 0.0          | 0                           | 0.0          | 0           | 0.0          |
| 94243 Pleomorphic xanthoastrocytoma                             | 8                            | 0.5          | 2           | 0.6          | 7                           | 0.7          | 2           | 1.0          |
| 94403 Glioblastoma, NOS                                         | 28                           | 1.7          | 17          | 5.2          | 13                          | 1.3          | 12          | 6.0          |
| 94413 Giant cell glioblastoma                                   | 1                            | 0.1          | 2           | 0.6          | 1                           | 0.1          | 1           | 0.5          |
| 94421 Gliofibroma                                               | 0                            | 0.0          | 0           | 0.0          | 0                           | 0.0          | 0           | 0.0          |
| 94423 Gliosarcoma                                               | 2                            | 0.1          | 1           | 0.3          | 2                           | 0.2          | 1           | 0.5          |
| <b>IIIc. INTRACRANIAL AND INTRASPINAL EMBRYONAL TUMOURS</b>     | <b>345</b>                   | <b>21.1</b>  | <b>40</b>   | <b>12.2</b>  | <b>201</b>                  | <b>20.7</b>  | <b>22</b>   | <b>11.1</b>  |
| <b>IIIc1. Medulloblastomas</b>                                  | <b>291</b>                   | <b>17.8</b>  | <b>32</b>   | <b>9.8</b>   | <b>160</b>                  | <b>16.5</b>  | <b>14</b>   | <b>7.0</b>   |
| 94703 Medulloblastoma, NOS                                      | 270                          | 16.5         | 28          | 8.5          | 148                         | 15.2         | 12          | 6.0          |
| 94713 Desmoplastic nodular medulloblastoma                      | 16                           | 1.0          | 4           | 1.2          | 8                           | 0.8          | 2           | 1.0          |
| 94723 Medulloblastoma                                           | 2                            | 0.1          | 0           | 0.0          | 1                           | 0.1          | 0           | 0.0          |
| 94743 Large cell medulloblastoma                                | 3                            | 0.2          | 0           | 0.0          | 3                           | 0.3          | 0           | 0.0          |
| 94803 Cerebellar sarcoma, NOS                                   | 0                            | 0.0          | 0           | 0.0          | 0                           | 0.0          | 0           | 0.0          |
| <b>IIIc2. PNET</b>                                              | <b>44</b>                    | <b>2.7</b>   | <b>8</b>    | <b>2.4</b>   | <b>36</b>                   | <b>3.7</b>   | <b>8</b>    | <b>4.0</b>   |
| 94733 Primitive neuroectodermal tumour, NOS                     | 44                           | 2.7          | 8           | 2.4          | 36                          | 3.7          | 8           | 4.0          |
| <b>IIIc3. Medulloepithelioma</b>                                | <b>5</b>                     | <b>0.3</b>   | <b>0</b>    | <b>0.0</b>   | <b>2</b>                    | <b>0.2</b>   | <b>0</b>    | <b>0.0</b>   |
| 95010 Medulloepithelioma, benign                                | 0                            | 0.0          | 0           | 0.0          | 0                           | 0.0          | 0           | 0.0          |
| 95013 Medulloepithelioma, NOS                                   | 2                            | 0.1          | 0           | 0.0          | 0                           | 0.0          | 0           | 0.0          |
| 95020 Teratoid medulloepithelioma, benign                       | 0                            | 0.0          | 0           | 0.0          | 0                           | 0.0          | 0           | 0.0          |
| 95023 Teratoid medulloepithelioma                               | 0                            | 0.0          | 0           | 0.0          | 0                           | 0.0          | 0           | 0.0          |
| 95033 Neuroepithelioma, NOS                                     | 3                            | 0.2          | 0           | 0.0          | 2                           | 0.2          | 0           | 0.0          |
| 95043 Spongioneuroblastoma                                      | 0                            | 0.0          | 0           | 0.0          | 0                           | 0.0          | 0           | 0.0          |
| <b>IIIc4. Atypical teratoid/rhabdoid tumour</b>                 | <b>5</b>                     | <b>0.3</b>   | <b>0</b>    | <b>0.0</b>   | <b>3</b>                    | <b>0.3</b>   | <b>0</b>    | <b>0.0</b>   |
| 95083 Atypical teratoid/rhabdoid tumour                         | 5                            | 0.3          | 0           | 0.0          | 3                           | 0.3          | 0           | 0.0          |
| <b>IIId. OTHER GLIOMAS</b>                                      | <b>170</b>                   | <b>10.4</b>  | <b>26</b>   | <b>7.9</b>   | <b>98</b>                   | <b>10.1</b>  | <b>11</b>   | <b>5.5</b>   |
| <b>IIId1. Oligodendrogliomas</b>                                | <b>30</b>                    | <b>1.8</b>   | <b>10</b>   | <b>3.0</b>   | <b>12</b>                   | <b>1.2</b>   | <b>2</b>    | <b>1.0</b>   |
| 94503 Oligodendroglioma, NOS                                    | 28                           | 1.7          | 9           | 2.7          | 10                          | 1.0          | 2           | 1.0          |
| 94513 Oligodendroglioma, anaplastic                             | 1                            | 0.1          | 1           | 0.3          | 1                           | 0.1          | 0           | 0.0          |
| 94603 Oligodendroblastoma                                       | 1                            | 0.1          | 0           | 0.0          | 1                           | 0.1          | 0           | 0.0          |
| <b>IIId2. Mixed and unspecified gliomas</b>                     | <b>134</b>                   | <b>8.2</b>   | <b>15</b>   | <b>4.6</b>   | <b>81</b>                   | <b>8.3</b>   | <b>8</b>    | <b>4.0</b>   |
| 93803 Glioma, malignant                                         | 128                          | 7.8          | 12          | 3.7          | 79                          | 8.1          | 7           | 3.5          |
| 93823 Mixed glioma                                              | 6                            | 0.4          | 3           | 0.9          | 2                           | 0.2          | 1           | 0.5          |
| <b>IIId3. Neuroepithelial glial tumours of uncertain origin</b> | <b>6</b>                     | <b>0.4</b>   | <b>1</b>    | <b>0.3</b>   | <b>5</b>                    | <b>0.5</b>   | <b>1</b>    | <b>0.5</b>   |
| 93813 Gliomatosis cerebri                                       | 4                            | 0.2          | 0           | 0.0          | 3                           | 0.3          | 0           | 0.0          |
| 94303 Astroblastoma                                             | 2                            | 0.1          | 1           | 0.3          | 2                           | 0.2          | 1           | 0.5          |
| 94441 Chordoid glioma                                           | 0                            | 0.0          | 0           | 0.0          | 0                           | 0.0          | 0           | 0.0          |

| Morphology ICD-O-3                                                  | Incidence period (1983-2007) |            |             |             | Survival period (1991-2005) |            |             |             |
|---------------------------------------------------------------------|------------------------------|------------|-------------|-------------|-----------------------------|------------|-------------|-------------|
|                                                                     | 0-14 years                   |            | 15-19 years |             | 0-14 years                  |            | 15-19 years |             |
|                                                                     | N                            | %          | N           | %           | N                           | %          | N           | %           |
| <b>IIIe. OTHER SPECIFIED INTRACRANIAL AND INTRASPINAL NEOPLASMS</b> | <b>136</b>                   | <b>8.3</b> | <b>52</b>   | <b>15.9</b> | <b>88</b>                   | <b>9.1</b> | <b>27</b>   | <b>13.6</b> |
| <b>IIIe1. Pituitary adenomas and carcinomas</b>                     | <b>13</b>                    | <b>0.8</b> | <b>11</b>   | <b>3.4</b>  | <b>6</b>                    | <b>0.6</b> | <b>6</b>    | <b>3.0</b>  |
| 82700 Chromophobe adenoma                                           | 3                            | 0.2        | 1           | 0.3         | 1                           | 0.1        | 0           | 0.0         |
| 82703 Chromophobe carcinoma                                         | 0                            | 0.0        | 0           | 0.0         | 0                           | 0.0        | 0           | 0.0         |
| 82710 Prolactinoma                                                  | 5                            | 0.3        | 6           | 1.8         | 3                           | 0.3        | 5           | 2.5         |
| 82720 Pituitary adenoma, NOS                                        | 3                            | 0.2        | 4           | 1.2         | 1                           | 0.1        | 1           | 0.5         |
| 82723 Pituitary carcinoma, NOS                                      | 0                            | 0.0        | 0           | 0.0         | 0                           | 0.0        | 0           | 0.0         |
| 82800 Acidophil adenoma                                             | 1                            | 0.1        | 0           | 0.0         | 0                           | 0.0        | 0           | 0.0         |
| 82803 Acidophil carcinoma                                           | 0                            | 0.0        | 0           | 0.0         | 0                           | 0.0        | 0           | 0.0         |
| 82810 Mixed acidophil-basophil adenoma                              | 0                            | 0.0        | 0           | 0.0         | 0                           | 0.0        | 0           | 0.0         |
| 82813 Mixed acidophil-basophil carcinoma                            | 0                            | 0.0        | 0           | 0.0         | 0                           | 0.0        | 0           | 0.0         |
| 83000 Basophil adenoma                                              | 1                            | 0.1        | 0           | 0.0         | 1                           | 0.1        | 0           | 0.0         |
| 83003 Basophil carcinoma                                            | 0                            | 0.0        | 0           | 0.0         | 0                           | 0.0        | 0           | 0.0         |
| <b>IIIe2. Tumours of the sellar region (craniopharyngiomas)</b>     | <b>64</b>                    | <b>3.9</b> | <b>9</b>    | <b>2.7</b>  | <b>42</b>                   | <b>4.3</b> | <b>5</b>    | <b>2.5</b>  |
| 93501 Craniopharyngioma                                             | 63                           | 3.9        | 9           | 2.7         | 41                          | 4.2        | 5           | 2.5         |
| 93511 Craniopharyngioma, adamantinomatous                           | 1                            | 0.1        | 0           | 0.0         | 1                           | 0.1        | 0           | 0.0         |
| 93521 Craniopharyngioma, papillary                                  | 0                            | 0.0        | 0           | 0.0         | 0                           | 0.0        | 0           | 0.0         |
| 95820 Granular cell tumour of sellar region                         | 0                            | 0.0        | 0           | 0.0         | 0                           | 0.0        | 0           | 0.0         |
| <b>IIIe3. Pineal parenchymal tumours</b>                            | <b>17</b>                    | <b>1.0</b> | <b>5</b>    | <b>1.5</b>  | <b>9</b>                    | <b>0.9</b> | <b>1</b>    | <b>0.5</b>  |
| 93601 Pinealoma                                                     | 6                            | 0.4        | 2           | 0.6         | 4                           | 0.4        | 0           | 0.0         |
| 93611 Pineocytoma                                                   | 1                            | 0.1        | 1           | 0.3         | 0                           | 0.0        | 1           | 0.5         |
| 93623 Pineoblastoma                                                 | 10                           | 0.6        | 2           | 0.6         | 5                           | 0.5        | 0           | 0.0         |
| <b>IIIe4. Neuronal and mixed neuronal-glial tumours</b>             | <b>19</b>                    | <b>1.2</b> | <b>5</b>    | <b>1.5</b>  | <b>14</b>                   | <b>1.4</b> | <b>4</b>    | <b>2.0</b>  |
| 94121 Desmoplastic infantile astrocytoma                            | 1                            | 0.1        | 0           | 0.0         | 1                           | 0.1        | 0           | 0.0         |
| 94130 Dysembryoplastic neuroepithelial tumour                       | 4                            | 0.2        | 1           | 0.3         | 3                           | 0.3        | 0           | 0.0         |
| 94920 Gangliocytoma                                                 | 1                            | 0.1        | 0           | 0.0         | 1                           | 0.1        | 0           | 0.0         |
| 94930 Dysplastic gangliocytoma of cerebellum (Lhermitte-Duclos)     | 0                            | 0.0        | 0           | 0.0         | 0                           | 0.0        | 0           | 0.0         |
| 95051 Ganglioglioma, NOS                                            | 12                           | 0.7        | 1           | 0.3         | 9                           | 0.9        | 1           | 0.5         |
| 95053 Ganglioglioma, anaplastic                                     | 0                            | 0.0        | 1           | 0.3         | 0                           | 0.0        | 1           | 0.5         |
| 95061 Central neurocytoma                                           | 1                            | 0.1        | 2           | 0.6         | 0                           | 0.0        | 2           | 1.0         |
| 95070 Pacinian tumour                                               | 0                            | 0.0        | 0           | 0.0         | 0                           | 0.0        | 0           | 0.0         |
| <b>IIIe5. Meningiomas</b>                                           | <b>23</b>                    | <b>1.4</b> | <b>12</b>   | <b>3.7</b>  | <b>17</b>                   | <b>1.7</b> | <b>11</b>   | <b>5.5</b>  |
| 95300 Meningioma, NOS                                               | 6                            | 0.4        | 7           | 2.1         | 3                           | 0.3        | 6           | 3.0         |
| 95301 Meningiomatosis, NOS                                          | 2                            | 0.1        | 0           | 0.0         | 2                           | 0.2        | 0           | 0.0         |
| 95303 Meningioma, malignant                                         | 7                            | 0.4        | 3           | 0.9         | 6                           | 0.6        | 3           | 1.5         |
| 95310 Meningothelial meningioma                                     | 2                            | 0.1        | 0           | 0.0         | 2                           | 0.2        | 0           | 0.0         |
| 95320 Fibrous meningioma                                            | 3                            | 0.2        | 1           | 0.3         | 1                           | 0.1        | 1           | 0.5         |
| 95330 Psammomatous meningioma                                       | 1                            | 0.1        | 0           | 0.0         | 1                           | 0.1        | 0           | 0.0         |
| 95340 Angiomatous meningioma                                        | 0                            | 0.0        | 0           | 0.0         | 0                           | 0.0        | 0           | 0.0         |
| 95350 Hemangioblastic meningioma                                    | 0                            | 0.0        | 0           | 0.0         | 0                           | 0.0        | 0           | 0.0         |
| 95370 Transitional meningioma                                       | 0                            | 0.0        | 1           | 0.3         | 0                           | 0.0        | 1           | 0.5         |
| 95381 Clear cell meningioma                                         | 1                            | 0.1        | 0           | 0.0         | 1                           | 0.1        | 0           | 0.0         |
| 95383 Papillary meningioma                                          | 1                            | 0.1        | 0           | 0.0         | 1                           | 0.1        | 0           | 0.0         |
| 95391 Atypical meningioma                                           | 0                            | 0.0        | 0           | 0.0         | 0                           | 0.0        | 0           | 0.0         |
| 95393 Meningeal sarcomatosis                                        | 0                            | 0.0        | 0           | 0.0         | 0                           | 0.0        | 0           | 0.0         |
| <b>IIIe6. Others</b>                                                | <b>0</b>                     | <b>0.0</b> | <b>10</b>   | <b>3.0</b>  | <b>0</b>                    | <b>0.0</b> | <b>0</b>    | <b>0.0</b>  |
| 87281 Meningeal melanocytoma                                        | 0                            | 0.0        | 0           | 0.0         | 0                           | 0.0        | 0           | 0.0         |
| 88500 Lipoma, NOS                                                   | 0                            | 0.0        | 0           | 0.0         | 0                           | 0.0        | 0           | 0.0         |
| 91210 Cavemous hemangioma                                           | 0                            | 0.0        | 1           | 0.3         | 0                           | 0.0        | 0           | 0.0         |
| 91611 Hemangioblastoma                                              | 0                            | 0.0        | 3           | 0.9         | 0                           | 0.0        | 0           | 0.0         |
| 91730 Cystic lymphangioma                                           | 0                            | 0.0        | 1           | 0.3         | 0                           | 0.0        | 0           | 0.0         |
| 93630 Melanotic neuroectodermal tumor                               | 0                            | 0.0        | 0           | 0.0         | 0                           | 0.0        | 0           | 0.0         |
| 95600 Neurilemoma, NOS                                              | 0                            | 0.0        | 5           | 1.5         | 0                           | 0.0        | 0           | 0.0         |
| <b>IIIf. UNSPECIFIED INTRACRANIAL AND INTRASPINAL NEOPLASMS</b>     | <b>139</b>                   | <b>8.5</b> | <b>45</b>   | <b>13.7</b> | <b>85</b>                   | <b>8.7</b> | <b>25</b>   | <b>12.6</b> |
| 80000 Neoplasm, benign                                              | 11                           | 0.7        | 1           | 0.3         | 9                           | 0.9        | 1           | 0.5         |
| 80001 Neoplasm, uncertain whether benign or malignant               | 29                           | 1.8        | 8           | 2.4         | 19                          | 2.0        | 3           | 1.5         |
| 80003 Neoplasm, malignant                                           | 94                           | 5.7        | 34          | 10.4        | 54                          | 5.6        | 20          | 10.1        |
| 80010 Tumour cells, benign                                          | 0                            | 0.0        | 0           | 0.0         | 0                           | 0.0        | 0           | 0.0         |
| 80011 Tumour cells, uncertain whether benign or malignant           | 0                            | 0.0        | 0           | 0.0         | 0                           | 0.0        | 0           | 0.0         |
| 80013 Tumour cells, malignant                                       | 1                            | 0.1        | 1           | 0.3         | 1                           | 0.1        | 1           | 0.5         |
| 80023 Malignant tumour, small cell type                             | 4                            | 0.2        | 1           | 0.3         | 2                           | 0.2        | 0           | 0.0         |
| 80033 Malignant tumour, giant cell type                             | 0                            | 0.0        | 0           | 0.0         | 0                           | 0.0        | 0           | 0.0         |
| 80043 Malignant tumour, spindle cell type                           | 0                            | 0.0        | 0           | 0.0         | 0                           | 0.0        | 0           | 0.0         |
| 80050 Clear cell tumour, NOS                                        | 0                            | 0.0        | 0           | 0.0         | 0                           | 0.0        | 0           | 0.0         |
| 80053 Malignant tumour, clear cell type                             | 0                            | 0.0        | 0           | 0.0         | 0                           | 0.0        | 0           | 0.0         |

Children: patients aged 0-14 year; Adolescents: patients aged 15-19 year; CNS: central nervous system (Group III of the ICC-3); ICC-3: International Classification of Childhood Cancer 3rd ed. [25]

**Table S2.** Number of cases of central nervous system (CNS) tumours according to the ICC-3, by sex and total, and age groups: period 1983-2007.

| ICC-3 CNS group                                              | N Boys |     |       |      |       | N Girls |     |       |      |       | N All |     |       |      |       |
|--------------------------------------------------------------|--------|-----|-------|------|-------|---------|-----|-------|------|-------|-------|-----|-------|------|-------|
|                                                              | 0-4    | 5-9 | 10-14 | 0-14 | 15-19 | 0-4     | 5-9 | 10-14 | 0-14 | 15-19 | 0-4   | 5-9 | 10-14 | 0-14 | 15-19 |
|                                                              |        |     |       |      |       |         |     |       |      |       |       |     |       |      |       |
| IIIa. Ependymomas and choroid plexus tumors                  | 50     | 29  | 26    | 105  | 13    | 31      | 15  | 12    | 58   | 7     | 81    | 44  | 38    | 163  | 20    |
| IIIb. Astrocytomas                                           | 125    | 111 | 119   | 355  | 81    | 106     | 110 | 111   | 327  | 64    | 231   | 221 | 230   | 682  | 145   |
| IIIc. Intracranial and intraspinal embryonal tumors          | 84     | 85  | 46    | 215  | 24    | 49      | 50  | 31    | 130  | 16    | 133   | 135 | 77    | 345  | 40    |
| IIId. Other gliomas                                          | 35     | 32  | 25    | 92   | 14    | 26      | 27  | 25    | 78   | 12    | 61    | 59  | 50    | 170  | 26    |
| IIIe. Other specified intracranial and intraspinal neoplasms | 14     | 28  | 37    | 79   | 24    | 11      | 18  | 28    | 57   | 28    | 25    | 46  | 65    | 136  | 52    |
| IIIf. Unspecified intracranial and intraspinal neoplasms     | 19     | 20  | 28    | 67   | 24    | 21      | 30  | 21    | 72   | 21    | 40    | 50  | 49    | 139  | 45    |
| III. All CNS                                                 | 327    | 305 | 281   | 913  | 180   | 244     | 250 | 228   | 722  | 148   | 571   | 555 | 509   | 1635 | 328   |

CNS: central nervous system (Group III of the ICC-3); ICC-3: International Classification of Childhood Cancer 3rd ed. [25]; N: number of cases.

**Table S3.** Age-specific incidence rates of central nervous system (CNS) tumours (IR) per million,<sup>1</sup> according to the ICC-3, by sex and total: period 1983-2007.

| ICC-3 CNS group                                              | IR Boys |      |       |      |       | IR Girls |      |       |      |       | IR All |      |       |      |       |
|--------------------------------------------------------------|---------|------|-------|------|-------|----------|------|-------|------|-------|--------|------|-------|------|-------|
|                                                              | 0-4     | 5-9  | 10-14 | 0-14 | 15-19 | 0-4      | 5-9  | 10-14 | 0-14 | 15-19 | 0-4    | 5-9  | 10-14 | 0-14 | 15-19 |
|                                                              |         |      |       |      |       |          |      |       |      |       |        |      |       |      |       |
| IIIa. Ependymomas and choroid plexus tumours                 | 6.3     | 3.3  | 2.6   | 4.0  | 1.8   | 4.2      | 1.8  | 1.3   | 2.3  | 1.0   | 5.3    | 2.6  | 2.0   | 3.2  | 1.4   |
| IIIb. Astrocytomas                                           | 15.8    | 12.8 | 12.1  | 13.4 | 11.3  | 14.2     | 13.4 | 11.9  | 13.1 | 9.4   | 15.0   | 13.1 | 12.0  | 13.3 | 10.4  |
| IIIc. Intracranial and intraspinal embryonal tumours         | 10.6    | 9.8  | 4.7   | 8.1  | 3.4   | 6.6      | 6.1  | 3.3   | 5.2  | 2.3   | 8.6    | 8.0  | 4.0   | 6.7  | 2.9   |
| IIId. Other gliomas                                          | 4.4     | 3.7  | 2.5   | 3.5  | 2.0   | 3.5      | 3.3  | 2.7   | 3.1  | 1.8   | 4.0    | 3.5  | 2.6   | 3.3  | 1.9   |
| IIIe. Other specified intracranial and intraspinal neoplasms | 1.8     | 3.2  | 3.8   | 3.0  | 3.4   | 1.5      | 2.2  | 3.0   | 2.3  | 4.1   | 1.6    | 2.7  | 3.4   | 2.6  | 3.7   |
| IIIf. Unspecified intracranial and intraspinal neoplasms     | 2.4     | 2.3  | 2.8   | 2.5  | 3.4   | 2.8      | 3.7  | 2.2   | 2.9  | 3.1   | 2.6    | 3.0  | 2.6   | 2.7  | 3.2   |
| III. All CNS                                                 | 41.3    | 35.2 | 28.6  | 34.5 | 25.2  | 32.7     | 30.4 | 24.4  | 28.9 | 21.7  | 37.1   | 32.9 | 26.5  | 31.8 | 23.5  |

<sup>1</sup> (Boys/girls/all)

CNS: central nervous system (Group III of the ICC-3); ICC-3: International Classification of Childhood Cancer 3rd ed. [25]; IR: age-specific incidence rates.

**Table S4.** Age-standardised incidence rates, world standard population (ASRw), per million<sup>1</sup> of central nervous system (CNS) tumours according to the ICC-3, by sex and total, and age group 0-14 and 0-19 year: period 1983-2007.

| ICC-3 CNS group                                             | ASRw Boys |      | ASRw Girls |      | ASRw All |      |
|-------------------------------------------------------------|-----------|------|------------|------|----------|------|
|                                                             | 0-14      | 0-19 | 0-14       | 0-19 | 0-14     | 0-19 |
|                                                             |           |      |            |      |          |      |
| IIIa. Ependymomas and choroid plexus tumours                | 4.3       | 3.7  | 2.6        | 2.2  | 3.5      | 3.0  |
| IIIb. Astrocytomas                                          | 13.7      | 13.2 | 13.3       | 12.4 | 13.5     | 12.8 |
| IIIc. Intracranial and intraspinal embryonal tumours        | 8.6       | 7.4  | 5.5        | 4.8  | 7.1      | 6.1  |
| IIId. Other gliomas                                         | 3.6       | 3.3  | 3.2        | 2.9  | 3.4      | 3.1  |
| IIIe. Other specified intracranial and intraspinal neoplasm | 2.8       | 2.9  | 2.1        | 2.6  | 2.5      | 2.8  |
| IIIf. Unspecified intracranial and intraspinal neoplasms    | 2.5       | 2.7  | 2.9        | 3.0  | 2.7      | 2.8  |
| III. All CNS                                                | 35.6      | 33.3 | 29.5       | 27.8 | 32.7     | 30.6 |

<sup>1</sup> (Boys/girls/all)

CNS: central nervous system (Group III of the ICC-3); ICC-3: International Classification of Childhood Cancer 3rd ed. [25]; ASRw: age-standardised incidence rates, world standard population.

## SURVIVAL

**-Note:** In the following tables survival results are not shown for <10 cases, log rank results are not shown when there are no survival results for all age groups, and log rank for trend results by age group, as well as annual percent change, when there are no survival results for the three cohorts.

**Table S5.** CNS tumours (malignant and non-malignant combined) in children, total and by diagnostic subgroups, period 1991-2005, by cohort of diagnosis. 5-year observed survival by age group, and standardised survival. Log rank comparing the equality of survival distributions by age group, log rank trend for observed survival, annual percent change for standardised survival and 5-year follow-up for the 0-14 year age group.

| Age group                                   | Cohort of diagnosis                     |                                         |                                         |                                         |           |             | Log rank trend (p) |
|---------------------------------------------|-----------------------------------------|-----------------------------------------|-----------------------------------------|-----------------------------------------|-----------|-------------|--------------------|
|                                             | 1991-1995                               |                                         | 1996-2000                               |                                         | 2001-2005 |             |                    |
|                                             | 5-y observed survival (%)<br>n (95% CI) |           |             |                    |
| III. All CNS tumours                        |                                         |                                         |                                         |                                         |           |             |                    |
| 0                                           | 21                                      | 43(22;64)                               | 13                                      | 77(54;100)                              | 15        | 60(35;85)   | 0.194              |
| 1-4                                         | 108                                     | 59(49;68)                               | 97                                      | 66(57;75)                               | 103       | 57(48;67)   | 0.502              |
| 5-9                                         | 102                                     | 57(47;67)                               | 107                                     | 58(48;67)                               | 107       | 63(53;72)   | 0.611              |
| 10-14                                       | 118                                     | 75(67;83)                               | 94                                      | 77(68;85)                               | 87        | 84(76;92)   | 0.298              |
| 0-14                                        | 349                                     | 63(58;68)                               | 311                                     | 67(62;72)                               | 312       | 67(61;72)   | 0.260              |
| Log rank(p)                                 |                                         | 0.002                                   | 0.055                                   |                                         | 0.001     |             |                    |
| Standardised survival                       |                                         |                                         |                                         |                                         |           |             | APC (95% CI)       |
| 0-14 years                                  |                                         | 62(57;67)                               | 67(62;72)                               |                                         | 67(62;72) |             | 4(-19;34)          |
| IIIa-Ependymomas and choroid plexus tumours |                                         |                                         |                                         |                                         |           |             |                    |
| 0                                           | 5                                       |                                         | 0                                       |                                         | 4         |             |                    |
| 1-4                                         | 12                                      | 33(7;60)                                | 8                                       |                                         | 16        | 31(9;54)    |                    |
| 5-9                                         | 8                                       |                                         | 4                                       |                                         | 8         |             |                    |
| 10-14                                       | 8                                       |                                         | 7                                       |                                         | 4         |             |                    |
| 0-14                                        | 33                                      | 46(28;63)                               | 19                                      | 58(36;80)                               | 32        | 47(30;64)   | 0.824              |
| Standardised survival                       |                                         |                                         |                                         |                                         |           |             | APC (95% CI)       |
| 0-14 years                                  |                                         | 45(29;61)                               | 52(31;74)                               |                                         | 54(40;67) |             | 8(-26;58)          |
| IIIb-Astrocytomas                           |                                         |                                         |                                         |                                         |           |             |                    |
| 0                                           | 9                                       |                                         | 6                                       |                                         | 7         |             |                    |
| 1-4                                         | 48                                      | 83(72;94)                               | 43                                      | 86(76;96)                               | 38        | 95(88;100*) | 0.260              |
| 5-9                                         | 40                                      | 75(62;88)                               | 51                                      | 77(65;88)                               | 36        | 81(68;94)   | 0.873              |
| 10-14                                       | 48                                      | 87(78;97)                               | 48                                      | 79(68;91)                               | 42        | 90(81;99)   | 0.277              |
| 0-14                                        | 145                                     | 80(73;86)                               | 148                                     | 81(75;87)                               | 123       | 89(83;94)   | 0.067              |
| Standardised survival                       |                                         |                                         |                                         |                                         |           |             | APC (95% CI)       |
| 0-14 years                                  |                                         | 80(73;86)                               | 82(75;88)                               |                                         | 88(83;94) |             | 6(-15;31)          |

Table S5. (contin.)

| Age group                                                   | Cohort of diagnosis                     |           |                                         |            |                                         |             | Log rank trend<br>(p) |
|-------------------------------------------------------------|-----------------------------------------|-----------|-----------------------------------------|------------|-----------------------------------------|-------------|-----------------------|
|                                                             | 1991-1995                               |           | 1996-2000                               |            | 2001-2005                               |             |                       |
|                                                             | 5-y observed survival (%)<br>n (95% CI) |           | 5-y observed survival (%)<br>n (95% CI) |            | 5-y observed survival (%)<br>n (95% CI) |             |                       |
| IIlc-Intracranial and intraspinal embryonal tumours         |                                         |           |                                         |            |                                         |             |                       |
| 0                                                           | 3                                       |           | 3                                       |            | 2                                       |             | 0.136                 |
| 1-4                                                         | 25                                      | 28(10;46) | 24                                      | 46(26;66)  | 26                                      | 35(16;53)   | 0.619                 |
| 5-9                                                         | 25                                      | 52(32;72) | 22                                      | 41(20;61)  | 26                                      | 54(35;73)   | 0.676                 |
| 10-14                                                       | 19                                      | 63(41;85) | 12                                      | 75(51;100) | 14                                      | 71(48;95)   | 0.878                 |
| 0-14                                                        | 72                                      | 46(34;57) | 61                                      | 51(38;63)  | 68                                      | 49(37;60)   | 0.995                 |
| Standardised survival                                       |                                         |           |                                         |            |                                         |             | APC (95% CI)          |
| 0-14 years                                                  |                                         |           | 45(34;56)                               |            | 51(39;63)                               |             | 4(-49;112)            |
| IIId-Other gliomas                                          |                                         |           |                                         |            |                                         |             |                       |
| 0                                                           | 1                                       |           | 1                                       |            | 1                                       |             |                       |
| 1-4                                                         | 12                                      | 58(30;86) | 11                                      | 64(35;92)  | 9                                       |             |                       |
| 5-9                                                         | 11                                      | 36(8;65)  | 10                                      | 50(19;81)  | 15                                      | 27(4;49)    | 0.619                 |
| 10-14                                                       | 14                                      | 57(31;83) | 8                                       |            | 5                                       |             |                       |
| 0-14y                                                       | 38                                      | 50(34;66) | 30                                      | 53(35;71)  | 30                                      | 30(14;46)   | 0.189                 |
| Standardised survival                                       |                                         |           |                                         |            |                                         |             | APC (95% CI)          |
| 0-14 years                                                  |                                         |           | 48(33;64)                               |            | 53(35;70)                               |             | -14(-87;455)          |
| IIle-Other specified intracranial and intraspinal neoplasms |                                         |           |                                         |            |                                         |             |                       |
| 0                                                           | 1                                       |           | 0                                       |            | 1                                       |             |                       |
| 1-4                                                         | 3                                       |           | 5                                       |            | 8                                       |             |                       |
| 5-9                                                         | 9                                       |           | 11                                      | 61(30;91)  | 9                                       |             |                       |
| 10-14                                                       | 12                                      | 100       | 13                                      | 77(54;100) | 16                                      | 94(82;100*) | 0.122                 |
| 0-14                                                        | 25                                      | 80(64;96) | 29                                      | 68(51;85)  | 34                                      | 85(73;97)   | 0.506                 |
| Standardised survival                                       |                                         |           |                                         |            |                                         |             | APC (95% CI)          |
| 0-14 years                                                  |                                         |           | 79(65;94)                               |            | 68(51;85)                               |             | 84(72;96)             |
| IIIf-Unspecified intracranial and intraspinal neoplasms     |                                         |           |                                         |            |                                         |             |                       |
| 0                                                           | 2                                       |           | 3                                       |            | 0                                       |             |                       |
| 1-4                                                         | 8                                       |           | 6                                       |            | 6                                       |             |                       |
| 5-9                                                         | 9                                       |           | 9                                       |            | 13                                      | 69(44;94)   |                       |
| 10-14                                                       | 17                                      | 53(29;77) | 6                                       |            | 6                                       |             |                       |
| 0-14                                                        | 36                                      | 47(31;63) | 24                                      | 42(22;61)  | 25                                      | 52(32;72)   | 0.492                 |
| Standardised survival                                       |                                         |           |                                         |            |                                         |             | APC (95% CI)          |
| 0-14 years                                                  |                                         |           | 44(29;59)                               |            | 48(36;60)                               |             | 47(28;66)             |
|                                                             |                                         |           |                                         |            |                                         |             | 4(-37;72)             |

CNS: central nervous system (Group III of the ICC-3); ICC-3: International Classification of Childhood Cancer 3rd ed. [25]; n: number of cases; 5-y: 5-year survival; (95% CI): confidence interval; APC: annual percent change. \*Truncated upper limit.

**Table S6.** CNS tumours (malignant and non-malignant combined) in adolescents by diagnostic subgroups of the ICCC-3, period 1991-2005, by cohort of diagnosis. 5-year observed survival and follow up. Log rank trend for observed survival.

*See note at top of first page of Supplementary Survival Tables*

| Cohort of diagnosis                     |           |                                         |             |                                         |           | Log rank trend (p) |
|-----------------------------------------|-----------|-----------------------------------------|-------------|-----------------------------------------|-----------|--------------------|
| 1991-1995                               |           | 1996-2000                               |             | 2001-2005                               |           |                    |
| 5-y observed survival (%)<br>n (95% CI) |           | 5-y observed survival (%)<br>n (95% CI) |             | 5-y observed survival (%)<br>n (95% CI) |           |                    |
|                                         |           |                                         |             |                                         |           |                    |
| III. All CNS tumours                    |           |                                         |             |                                         |           |                    |
| 67                                      | 66(54;77) | 69                                      | 71(60;81)   | 63                                      | 58(46;70) | 0.380              |
| IIIb-Astrocytomas                       |           |                                         |             |                                         |           |                    |
| 40                                      | 73(59;86) | 30                                      | 76(61;91)   | 28                                      | 64(46;82) | 0.650              |
| IIIe-Other specified                    |           |                                         |             |                                         |           |                    |
| 5                                       |           | 13                                      | 92(78;100*) | 9                                       |           |                    |

CNS: central nervous system (Group III of the ICCC-3); ICCC-3: International Classification of Childhood Cancer 3rd ed. [25]; n: number of cases; 5-y: 5-year survival; (95% CI): confidence interval.

**Table S7.** Pilocytic astrocytoma<sup>a</sup> in children, period 1991-2005. 5-year observed survival by cohort of diagnosis and age group, and standardised survival. Log rank comparing the equality of survival distributions by age group, log rank trend for observed survival, annual percent change for standardised survival, and 5-year follow up for the 0-14 year age group.

See note at the top of first page of Supplementary Survival Tables

| Age group             | Cohort of diagnosis                |             |                                    |             |                                    |             | Log rank trend ( <i>p</i> ) |
|-----------------------|------------------------------------|-------------|------------------------------------|-------------|------------------------------------|-------------|-----------------------------|
|                       | 1991-1995                          |             | 1996-2000                          |             | 2001-2005                          |             |                             |
|                       | 5-y observed survival (%) (95% CI) |             | 5-y observed survival (%) (95% CI) |             | 5-y observed survival (%) (95% CI) |             |                             |
| 0                     | 2                                  |             | 2                                  |             | 2                                  |             |                             |
| 1-4                   | 8                                  |             | 14                                 | 93(79;100*) | 7                                  |             |                             |
| 5-9                   | 3                                  |             | 24                                 | 88(74;100*) | 15                                 | 100         |                             |
| 10-14                 | 10                                 | 90(71;100*) | 12                                 | 92(76;100*) | 14                                 | 100         | 0.510                       |
| 0-14                  | 23                                 | 91(79;100*) | 52                                 | 90(82;98)   | 38                                 | 95(88;100*) | 0.532                       |
| Standardised survival |                                    |             |                                    |             |                                    |             | APC (95% CI)                |
| 0-14 years            |                                    |             | 94(87;100*)                        |             | 91(83;99)                          |             | 93(84;100*)                 |
|                       |                                    |             |                                    |             |                                    |             | -1(-19;21)                  |

n: number of cases; 5-y: 5-year survival; (95% CI): confidence interval; APC: annual percent change; <sup>a</sup>ICD-O-3 morphology code: 9421/1; ICD-O-3: International Classification of Diseases for Oncology 3rd ed. [26]; \*Truncated upper limit.

**Table S8.** Astrocytoma NOS<sup>a</sup> in children, period 1991-2005. 5-year observed survival by cohort of diagnosis and age group, and standardised survival. Log rank comparing the equality of survival distributions by age group, log rank trend for observed survival, annual percent change for standardised survival, and 5-year follow up for the 0-14 year age group.

|                       | Cohort of diagnosis |                                       |           |                                       |           |                                       | Log rank trend<br>(p) |
|-----------------------|---------------------|---------------------------------------|-----------|---------------------------------------|-----------|---------------------------------------|-----------------------|
|                       | 1991-1995           |                                       | 1996-2000 |                                       | 2001-2005 |                                       |                       |
| Age group             | n                   | 5-y observed survival (%)<br>(95% CI) | n         | 5-y observed survival (%)<br>(95% CI) | n         | 5-y observed survival (%)<br>(95% CI) |                       |
| 0                     | 5                   |                                       | 4         |                                       | 3         |                                       |                       |
| 1-4                   | 32                  | 78(64;92)                             | 21        | 91(78;100*)                           | 18        | 100                                   | 0.083                 |
| 5-9                   | 33                  | 76(61;91)                             | 16        | 81(62;100*)                           | 13        | 77(54;100)                            | 0.951                 |
| 10-14                 | 31                  | 87(75;99)                             | 24        | 71(53;89)                             | 12        | 92(76;100*)                           | 0.197                 |
| 0-14                  | 101                 | 79(71;87)                             | 65        | 82(72;91)                             | 46        | 89(80;98)                             | 0.208                 |
| Standardised survival |                     |                                       |           |                                       |           |                                       | APC (95% CI)          |
| 0-14 years            |                     |                                       | 79(71;87) |                                       | 82(73;91) |                                       | 89(80;98)<br>6(-8;22) |

n: number of cases; 5-y: 5-year survival; (95% CI): confidence interval; APC: annual percent change; NOS: not otherwise specified; <sup>a</sup> ICD-O-3 morphology code: 9400/3; ICD-O-3: International Classification of Diseases for Oncology 3rd ed. [26]; \*Truncated upper limit; ^Statistically significant trend.

**Table S9** Malignant<sup>a</sup> and non-malignant<sup>b</sup> CNS tumours in children, period 1991-2005, by cohort of diagnosis and behaviour. 5-year observed survival by age group, and standardised survival. Log rank comparing the equality of survival distributions by age group, log rank trend for observed survival, annual percent change for standardised survival, and 5-year follow up for the 0-14 year age group.

See note at top of first page of Supplementary Survival Tables

| Age group             | Cohort of diagnosis |                                    |           |                                    |           |                                    | Log rank trend (p) |
|-----------------------|---------------------|------------------------------------|-----------|------------------------------------|-----------|------------------------------------|--------------------|
|                       | 1991-1995           |                                    | 1996-2000 |                                    | 2001-2005 |                                    |                    |
|                       | n                   | 5-y observed survival (%) (95% CI) | n         | 5-y observed survival (%) (95% CI) | n         | 5-y observed survival (%) (95% CI) |                    |
| Malignant tumours     |                     |                                    |           |                                    |           |                                    |                    |
| 0                     | 17                  | 35(13;58)                          | 10        | 70(42;98)                          | 11        | 46(16;75)                          | 0.286              |
| 1-4                   | 94                  | 53(43;63)                          | 76        | 61(50;71)                          | 86        | 54(43;64)                          | 0.667              |
| 5-9                   | 88                  | 57(46;67)                          | 71        | 47(35;58)                          | 77        | 49(38;61)                          | 0.436              |
| 10-14                 | 94                  | 70(60;79)                          | 64        | 70(59;81)                          | 50        | 80(69;91)                          | 0.411              |
| 0-14                  | 293                 | 58(53;64)                          | 221       | 59(53;66)                          | 224       | 58(51;64)                          | 0.879              |
| Log Rank (p)          |                     | 0.005                              | 0.073     |                                    | 0.006     |                                    |                    |
| Standardised survival |                     |                                    |           |                                    |           |                                    | APC (95% CI)       |
| 0-14 years            |                     | 58(52;64)                          | 59(53;66) |                                    | 59(53;65) |                                    | 1(-8;11)           |
| Non-malignant tumours |                     |                                    |           |                                    |           |                                    |                    |
| 0                     | 4                   |                                    | 3         |                                    | 4         |                                    |                    |
| 1-4                   | 14                  | 100                                | 21        | 86(71;100*)                        | 17        | 77(56;97)                          | 0.185              |
| 5-9                   | 14                  | 57(31;83)                          | 36        | 80(67;93)                          | 30        | 97(90;100*)                        | 0.003              |
| 10-14                 | 24                  | 96(88;100*)                        | 30        | 90(79;100*)                        | 37        | 89(79;99)                          | 0.668              |
| 0-14                  | 56                  | 86(76;95)                          | 90        | 85(78;93)                          | 88        | 90(84;96)                          | 0.390              |
| Standardised survival |                     |                                    |           |                                    |           |                                    | APC (95% CI)       |
| 0-14 years            |                     | 83(73;92)                          | 86(79;93) |                                    | 89(83;96) |                                    | 4^(2;6)            |

CNS: central nervous system (Group III of the ICCC-3); ICCC-3: International Classification of Childhood Cancer 3rd ed. [25]; n: number of cases; 5-y: 5-year survival; (95% CI): confidence interval; APC: annual percent change; <sup>a</sup> Malignant: 5<sup>th</sup> digit of the morphology code of the ICD-O-3 equal 3; <sup>b</sup> Non-malignant: 5<sup>th</sup> digit of the morphology code of the ICD-O-3 < 3; ICD-O-3: International Classification of Diseases for Oncology 3rd ed. [26]; \*Truncated upper limit; ^Statistically significant trend.



**Table S10.** Lethal CNS tumours<sup>a</sup> in children, period 1991-2005, by cohort of diagnosis. 5-year observed survival by age group, and standardised survival. Log rank comparing the equality of survival distributions by age groups, log rank trend for observed survival, annual percent change for standardised survival, and 5-year follow up for the 0-14 year age group.

See note at top of first page of Supplementary Survival Tables

| Age group                        | Cohort of diagnosis |                                    |           |                                    |           |                                    |
|----------------------------------|---------------------|------------------------------------|-----------|------------------------------------|-----------|------------------------------------|
|                                  | 1991-1995           |                                    | 1996-2000 |                                    | 2001-2005 |                                    |
|                                  | n                   | 5-y observed survival (%) (95% CI) | n         | 5-y observed survival (%) (95% CI) | n         | 5-y observed survival (%) (95% CI) |
| 0-14                             | 10                  | 33(3;64)                           | 9         |                                    | 15        | 53(27;78)                          |
| Standardised survival 0-14 years |                     | 32(9;54)                           |           |                                    |           | 49(26;73)                          |

CNS: central nervous system (Group III of the ICCC-3); ICCC-3: International Classification of Childhood Cancer 3rd ed. [25]; n: number of cases; 5-y: 5-year survival; (95% CI): confidence interval; APC: annual percent change; <sup>a</sup>ICD-O-3 morphology codes: 9508/3, 9401/3, 9451/3, 9440/3, 9441/3, 9442/3; ICD-O-3: International Classification of Diseases for Oncology 3rd ed. [26].

**Table S11.** Gliomas<sup>a</sup> in children, period 1991-2005, by cohort of diagnosis. 5-year observed survival by age group, and standardised survival. Log rank comparing the equality of survival distributions by age groups and log rank trend for observed survival, annual percent change for standardised survival, and 5-year follow up for the 0-14 year age group.

See note at top of first page of Supplementary Survival Tables

| Age group                        | Cohort of diagnosis |                                    |           |                                    |           |                                    |
|----------------------------------|---------------------|------------------------------------|-----------|------------------------------------|-----------|------------------------------------|
|                                  | 1991-1995           |                                    | 1996-2000 |                                    | 2001-2005 |                                    |
|                                  | n                   | 5-y observed survival (%) (95% CI) | n         | 5-y observed survival (%) (95% CI) | n         | 5-y observed survival (%) (95% CI) |
| 0-14                             | 28                  | 43(24;61)                          | 23        | 48(27;68)                          | 28        | 25(9;41)                           |
| Standardised survival 0-14 years |                     | 41(23;60)                          |           | 46(27;65)                          |           | 31(17;44)                          |
|                                  |                     |                                    |           |                                    |           | Log rank trend (p)                 |
|                                  |                     |                                    |           |                                    |           | 0.342                              |
|                                  |                     |                                    |           |                                    |           | APC (95% CI)                       |
|                                  |                     |                                    |           |                                    |           | -14(-89;581)                       |

n: number of cases; 5-y: 5-year survival; (95% CI): confidence interval; APC: annual percent change; <sup>a</sup>ICD-O-3 morphology code: 9380/3, optical tract excluded; ICD-O-3: International Classification of Diseases for Oncology 3rd ed. [26].

**Table-S12.** CNS tumours in children in Spain (2001-05) and Europe (2000-07). Relative frequency distribution by diagnostic subgroups of Group III of ICCC-3.

| Diagnostic subgroup                                        | WHO grade | Europe 2000-2007 |             | Spain 2001-2005 |             | p |
|------------------------------------------------------------|-----------|------------------|-------------|-----------------|-------------|---|
|                                                            |           | N                | %           | N               | %           |   |
| <b>IIla-Ependymoma and choroid plexus</b>                  |           | <b>1,534</b>     | <b>10.2</b> | <b>32</b>       | <b>10.3</b> |   |
| Choroid plexus papilloma                                   | I         | 172              | 11.2        | 2               | 6.3         |   |
| Subependymoma                                              | I         | 20               | 1.3         | 0               | 0.0         |   |
| Myxopapillary ependymoma                                   | I         | 75               | 4.9         | 4               | 12.5        |   |
| Atypical choroid plexus papilloma                          | II        | 35               | 2.3         | 0               | 0.0         |   |
| Ependymoma, other and NOS <sup>a</sup>                     | II        | 591              | 38.5        | 14              | 43.8        |   |
| Choroid plexus carcinoma                                   | III       | 150              | 9.8         | 1               | 3.1         |   |
| Anaplastic ependymoma                                      | III       | 491              | 32.0        | 11              | 34.4        |   |
| <b>IIlb-Astrocytomas</b>                                   |           | <b>6,078</b>     | <b>40.5</b> | <b>123</b>      | <b>39.4</b> |   |
| Pilocytic astrocytoma                                      | I         | 3,231            | 53.2        | 38              | 30.9        | * |
| Subependymal giant cell astrocytoma                        | I         | 136              | 2.2         | 3               | 2.4         |   |
| Glioma (optic nerve)                                       | I         | 611              | 10.1        | 13              | 10.6        |   |
| Pleomorphic xanthoastrocytoma                              | II        | 73               | 1.2         | 3               | 2.4         |   |
| Fibrillary astrocytoma                                     | II        | 182              | 3.0         | 5               | 4.1         |   |
| Protoplasmic astrocytoma                                   | II        | 19               | 0.3         | 3               | 2.4         | * |
| Gemistocytic astrocytoma                                   | II        | 8                | 0.1         | 0               | 0.0         |   |
| Anaplastic astrocytoma                                     | III       | 338              | 5.6         | 5               | 4.1         |   |
| Glioblastoma and variants <sup>b</sup>                     | IV        | 530              | 8.7         | 7               | 5.7         |   |
| Astrocytomas NOS <sup>c</sup>                              | -         | 948              | 15.6        | 46              | 37.4        | * |
| Gliofibroma                                                | -         | 2                | 0.0         | 0               | 0.0         |   |
| <b>IIlc-Intracranial and intraspinal embryonal tumours</b> |           | <b>3,097</b>     | <b>20.6</b> | <b>68</b>       | <b>21.8</b> |   |
| Medulloblastoma, variants <sup>d</sup>                     | IV        | 2,006            | 64.8        | 47              | 69.1        |   |
| Medulloblastoma large cell                                 | IV        | 52               | 1.7         | 1               | 1.5         |   |
| Desmoplastic/nodular medulloblastoma                       | IV        | 237              | 7.7         | 3               | 4.4         |   |
| PNET, variants                                             | IV        | 544              | 17.6        | 14              | 20.6        |   |
| Atypical teratoid/rhabdoid tumour                          | IV        | 258              | 8.3         | 3               | 4.4         |   |
| <b>IIId-Other gliomas</b>                                  |           | <b>1,642</b>     | <b>10.9</b> | <b>30</b>       | <b>9.6</b>  |   |
| Oligodendroglioma <sup>e</sup>                             | II        | 212              | 12.9        | 1               | 3.3         |   |
| Oligodendroglioma, anaplastic                              | III       | 91               | 5.5         | 0               | 0.0         |   |
| Glioma, mixed                                              | III       | 137              | 8.3         | 1               | 3.3         |   |
| Astroblastoma                                              | -         | 19               | 1.2         | 0               | 0.0         |   |
| Chordoid glioma                                            | -         | 1                | 0.1         | 0               | 0.0         |   |
| Gliomatosis cerebri                                        | -         | 30               | 1.8         | 0               | 0.0         |   |
| Glioma NOS (excluding optic nerve)                         | -         | 1,152            | 70.2        | 28              | 93.3        |   |

Table S12 continues on next page

Table-S12. (contin.)

| Diagnostic subgroup                        | WHO grade | Europe 2000-2007 |             | Spain 2001-2005 |             | p |
|--------------------------------------------|-----------|------------------|-------------|-----------------|-------------|---|
|                                            |           | N                | %           | N               | %           |   |
| <b>IIle-Other specified CNS tumours</b>    |           | <b>1,866</b>     | <b>12.4</b> | <b>34</b>       | <b>10.9</b> |   |
| Pinealoma and pineocytoma                  | I         | 19               | 1.0         | 1               | 2.9         |   |
| Desmoplastic infantile astrocytoma         | I         | 59               | 3.2         | 1               | 2.9         |   |
| Dysembryoplastic neuroepithelial tumour    | I         | 322              | 17.3        | 2               | 5.9         |   |
| Gangliocytomas, ganglioglioma <sup>f</sup> | I         | 402              | 21.5        | 5               | 14.7        |   |
| Meningioma, non-malignant <sup>g</sup>     | I         | 188              | 10.1        | 3               | 8.8         |   |
| Craniopharyngioma <sup>h</sup>             | I         | 608              | 32.6        | 17              | 50.0        |   |
| Central neurocytoma                        | II        | 17               | 0.9         | 0               | 0.0         |   |
| Ganglioglioma, anaplastic                  | III       | 25               | 1.3         | 0               | 0.0         |   |
| Meningioma, malignant <sup>i</sup>         | III       | 29               | 1.6         | 2               | 5.9         |   |
| Pineoblastoma                              | IV        | 105              | 5.6         | 2               | 5.9         |   |
| Pituitary tumour <sup>j</sup>              | -         | 92               | 4.9         | 1               | 2.9         |   |
| <b>IIIf-Unspecified CNS</b>                |           | <b>800</b>       | <b>5.3</b>  | <b>25</b>       | <b>8.0</b>  |   |
| Malignant                                  | -         | 429              | 53.6        | 14              | 56.0        |   |
| Benign                                     | -         | 371              | 46.4        | 11              | 44.0        |   |
| <b>III CNS</b>                             |           | <b>15,017</b>    |             | <b>312</b>      |             |   |

CNS: central nervous system (Group III of the ICCC-3). ICCC-3: International Classification of Childhood Cancer 3rd ed. [25]. WHO grade[49] as applied by Gatta et al 2017[37]. European data from Gatta et al. 2017[37]. *p*: Adjusted p-value. Chi-squared tests were used to compare between the observed proportions in Spain and those reported in Europe. Yates correction for continuity was used to account for the low frequency of some morphologies. p-values were adjusted for multiple testing using the Benjamini and Hochberg method [50]. \*Adjusted p-value < 0.05.

<sup>a</sup> Includes ependymoma, NOS and papillary ependymoma. <sup>b</sup> Includes glioblastoma, NOS; giant cell glioblastoma and gliosarcoma. <sup>c</sup> Includes astrocytoma, NOS and polar spongioblastoma. <sup>d</sup> Includes medulloblastoma, NOS; medulloblastoma; cerebellar sarcoma, NOS; medulloepithelioma, NOS and neuroepithelioma, NOS. <sup>e</sup> Includes oligodendroglioma, NOS and oligodendroblastoma. <sup>f</sup> Includes gangliocytoma; dysplastic gangliocytoma of cerebellum (Lhermitte-Duclos) and ganglioglioma, NOS. <sup>g</sup>Includes meningioma, NOS; meningiomatosis, NOS; meningothelial meningioma; fibrous meningioma; psammomatous meningioma; angiomatous meningioma; hemangioblastic meningioma; transitional meningioma; clear cell meningioma and atypical meningioma. <sup>h</sup> Includes craniopharyngioma, adamantinomatous craniopharyngioma and papillary craniopharyngioma. <sup>i</sup>Includes meningioma, malignant; papillary meningioma and meningeal sarcomatosis. <sup>j</sup> Includes chromophobe adenoma; prolactinoma; pituitary adenoma, NOS; acidophil adenoma; mixed acidophil-basophil adenoma and basophil adenoma.

**Table S13.** Percentage of non-malignant tumours in children registered across the study period (incidence period 1983-2007) by individual registry and five-year period.

| Registry              | Incidence period |           |           |           |           | Total |
|-----------------------|------------------|-----------|-----------|-----------|-----------|-------|
|                       | 1983-1987        | 1988-1992 | 1993-1997 | 1998-2002 | 2003-2007 |       |
| Albacete              | 0.0              | 0.0       | 0.0       | 0.0       | 0.0       | 0.0   |
| Asturias              | 4.5              | 12.5      | 30.8      | 30.8      | 25.0      | 18.5  |
| Balearic Is           | 0.0              | 10.5      | 18.8      | 41.2      | 30.0      | 24.2  |
| Basque Country        | 19.2             | 22.9      | 32.4      | 50.0      | 27.6      | 30.3  |
| Girona                | 11.8             | 27.8      | 22.2      | 28.6      | 46.7      | 27.0  |
| Granada               | 14.3             | 20.0      | 23.5      | 35.3      | 31.6      | 25.3  |
| Murcia                | 0.0              | 0.0       | 0.0       | 0.0       | 0.0       | 0.0   |
| Navarre               | 25.0             | 0.0       | 27.3      | 22.7      | 21.4      | 21.0  |
| Tarragona             | 8.3              | 8.3       | 28.6      | 12.5      | 16.7      | 15.6  |
| Valencian Community   | 12.6             | 12.9      | 21.5      | 35.8      | 30.8      | 23.1  |
| Zaragoza              | 25.9             | 9.1       | 14.3      | 25.9      | 52.4      | 26.1  |
| <b>All registries</b> | 13.8             | 13.7      | 22.2      | 31.5      | 27.9      | 22.0  |

**Table S14.** Percentage of non-malignant tumours in children registered in the survival period (1991-2005) by individual registry<sup>a</sup> and five-year period.

| Registry              | Survival period |           |           | Total |
|-----------------------|-----------------|-----------|-----------|-------|
|                       | 1991-1995       | 1996-2000 | 2001-2005 |       |
| Albacete              | 0.0             | 0.0       | 0.0       | 0.0   |
| Asturias              | 30.8            | 21.1      | 35.3      | 28.6  |
| Balearic Is           | 12.5            | 37.5      | 35.3      | 28.6  |
| Basque Country        | 24.3            | 47.5      | 32.6      | 34.3  |
| Girona                | 25.0            | 20.0      | 44.4      | 29.8  |
| Granada               | 8.3             | 46.2      | 41.2      | 27.8  |
| Murcia                | 0.0             | 0.0       | 0.0       | 0.0   |
| Navarre               | 10.0            | 26.3      | 22.2      | 21.3  |
| Tarragona             | 0.0             | 36.4      | 11.1      | 17.2  |
| Valencian Community   | 17.9            | 25.8      | 30.7      | 24.8  |
| <b>All registries</b> | 16.0            | 28.9      | 28.2      | 24.1  |

<sup>a</sup> The Zaragoza cancer registry did not contribute to the survival study.

**Table S15.** Percentage of non-malignant tumours in children registered in 1991-2005 by individual registry. Four registries were excluded due to incomplete registration of non-malignant tumours (<25% of non-malignant tumours).

| Registry              | Survival period |           |           | Total |
|-----------------------|-----------------|-----------|-----------|-------|
|                       | 1991-1995       | 1996-2000 | 2001-2005 |       |
| Asturias              | 30.8            | 21.1      | 35.3      | 28.6  |
| Balearic Is           | 12.5            | 37.5      | 35.3      | 28.6  |
| Basque Country        | 24.3            | 47.5      | 32.6      | 34.3  |
| Girona                | 25.0            | 20.0      | 44.4      | 29.8  |
| Granada               | 8.3             | 46.2      | 41.2      | 27.8  |
| Valencian Community   | 17.9            | 25.8      | 30.7      | 24.8  |
| <b>All registries</b> | 19.6            | 31.9      | 33.3      | 27.9  |

**Figure S1.** Total percentage of non-malignant tumours registered by all PBCRs across the study period (incidence period 1983-2007), by calendar year.

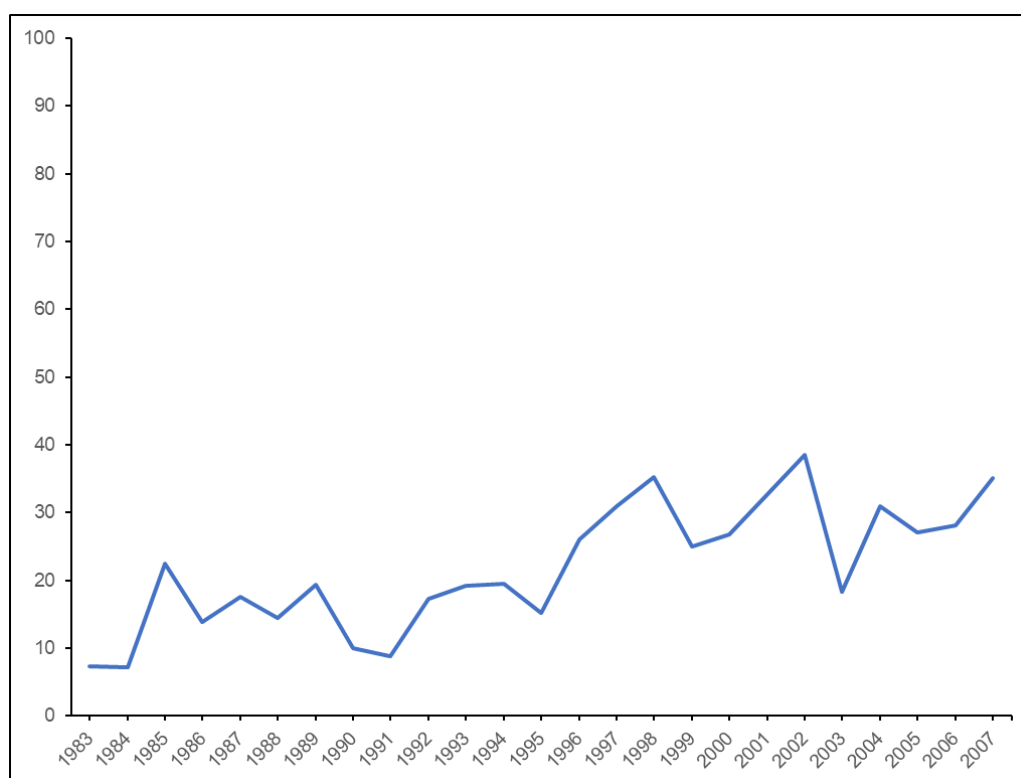

**Figure S2.** Total percentage of non-malignant tumours registered by the PBCRs participating in the survival period (1991-2005)<sup>a</sup>, by calendar year.

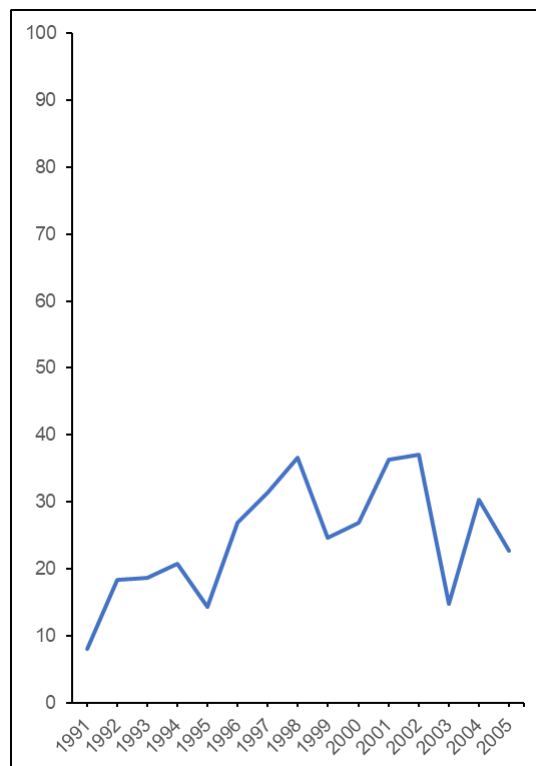

<sup>a</sup> The Zaragoza cancer registry did not contribute to the survival study.
